# Supplementary material for: Absolute income is a better predictor of coverage by skilled birth attendance than relative wealth quintiles in a multicountry analysis: comparison of 100 low- and middle-income countries
Source: PubMed Central journal article supplement (PMC5902965; doi:10.1186/s12884-018-1734-0), 2018-04-16
Supplement: 12884_2018_1734_MOESM1_ESM.pdf [file 12884_2018_1734_MOESM1_ESM.pdf]

| Country        | Earliest survey | 2nd survey | 3rd survey | 4th survey | 5th survey | 6th survey | 7th/8th surveys | Country    | Earliest survey | 2nd survey | 3rd survey | 4th survey | 5th survey | 6th survey |
|----------------|-----------------|------------|------------|------------|------------|------------|-----------------|------------|-----------------|------------|------------|------------|------------|------------|
| Afghanistan    | 2010            |            |            |            |            |            |                 | Lesotho    | 2004            | 2009       | 2014       |            |            |            |
| Albania        | 2002            | 2005       | 2008       |            |            |            |                 | Liberia    | 2007            | 2013       |            |            |            |            |
| Algeria        | 2012            |            |            |            |            |            |                 | Macedonia  | 2005            | 2011       |            |            |            |            |
| Armenia        | 2000            | 2005       | 2010       |            |            |            |                 | Madagascar | 1997            | 2003       | 2008       |            |            |            |
| Azerbaijan     | 2006            |            |            |            |            |            |                 | Malawi     | 2000            | 2004       | 2006       | 2010       | 2013       |            |
| Bangladesh     | 1993            | 1996       | 1999       | 2004       | 2007       | 2011       | 2012 & 2014     | Maldives   | 2009            |            |            |            |            |            |
| Barbados       | 2012            |            |            |            |            |            |                 | Mali       | 1995            | 2001       | 2006       | 2012       |            |            |
| Belarus        | 2005            | 2012       |            |            |            |            |                 | Mauritania | 2007            | 2011       |            |            |            |            |
| Belize         | 1991            | 2006       | 2011       |            |            |            |                 | Moldova    | 2005            | 2012       |            |            |            |            |
| Benin          | 1996            | 2001       | 2006       | 2011       |            |            |                 | Mongolia   | 2005            | 2010       | 2013       |            |            |            |
| Buthan         | 2010            |            |            |            |            |            |                 | Montenegro | 2005            | 2013       |            |            |            |            |
| Bolivia        | 1994            | 1998       | 2003       | 2008       |            |            |                 | Morocco    | 2003            |            |            |            |            |            |
| Bosnia & Herz. | 2006            | 2011       |            |            |            |            |                 | Mozambique | 1997            | 2003       | 2008       | 2011       |            |            |
| Brazil         | 1996            | 2006       |            |            |            |            |                 | Namibia    | 2000            | 2006       | 2013       |            |            |            |
| Burkina_Faso   | 1998            | 2003       | 2006       | 2010       |            |            |                 | Nepal      | 1996            | 2001       | 2006       | 2011       | 2014       |            |
| Burundi        | 2005            | 2010       |            |            |            |            |                 | Nicaragua  | 1998            | 2001       | 2006       |            |            |            |
| Cambodia       | 2000            | 2005       | 2010       | 2014       |            |            |                 | Niger      | 1998            | 2006       | 2012       |            |            |            |
| Cameroon       | 1998            | 2004       | 2006       | 2011       |            |            |                 | Nigeria    | 1999*           | 2003       | 2007       | 2008       | 2011       | 2013       |
| CAR            | 1994            | 2006       | 2010       |            |            |            |                 | Pakistan   | 2006            | 2012       |            |            |            |            |
| Chad           | 1996            | 2004       | 2010       | 2014       |            |            |                 | Panama     | 2013            |            |            |            |            |            |
| Colombia       | 1995            | 2000       | 2005       | 2010       |            |            |                 | Paraguay   | 1995            | 1998       | 2004       | 2008       |            |            |

|                   |       |      |      |      |      |      |      |                     |      |      |             |      |      |  |
|-------------------|-------|------|------|------|------|------|------|---------------------|------|------|-------------|------|------|--|
| Comoros           | 1996  | 2012 |      |      |      |      |      | Philippines         | 1993 | 1998 | 2003        | 2008 | 2013 |  |
| Congo_Brazzaville | 2005  | 2011 |      |      |      |      |      | Peru                | 1996 | 2000 | 2004/2012** |      |      |  |
| Congo_D.R.        | 2007  | 2010 | 2013 |      |      |      |      | Rwanda              | 2000 | 2005 | 2010        | 2014 |      |  |
| Costa_Rica        | 1992  | 2011 |      |      |      |      |      | São_Tome_&_P.       | 2008 | 2014 |             |      |      |  |
| Cote_dIvoire      | 1994  | 1998 | 2006 | 2011 |      |      |      | Senegal             | 1997 | 2005 | 2010        | 2012 | 2014 |  |
| Dominican_Rep.    | 1996  | 1999 | 2002 | 2007 | 2013 | 2014 |      | Serbia              | 2005 | 2010 | 2014        |      |      |  |
| Ecuador           | 1994  | 1999 | 2004 |      |      |      |      | Sierra_Leone        | 2005 | 2008 | 2010        | 2013 |      |  |
| Egypt             | 1995  | 2000 | 2005 | 2008 | 2014 |      |      | South_Sudan         | 2010 |      |             |      |      |  |
| El_Savador        | 2014  |      |      |      |      |      |      | St_Lucia            | 2012 |      |             |      |      |  |
| Ethiopia          | 2000  | 2005 | 2011 |      |      |      |      | Sudan               | 2010 | 2014 |             |      |      |  |
| Gabon             | 2000  | 2012 |      |      |      |      |      | Suriname            | 2006 | 2010 |             |      |      |  |
| Gambia            | 2005  | 2013 |      |      |      |      |      | Swaziland           | 2006 | 2010 | 2014        |      |      |  |
| Georgia           | 2005  |      |      |      |      |      |      | Tajikistan          | 2005 | 2012 |             |      |      |  |
| Ghana             | 1993  | 1998 | 2003 | 2006 | 2008 | 2011 | 2014 | Tanzania            | 1996 | 1999 | 2004        | 2010 |      |  |
| Guatemala         | 1995  | 1998 | 2008 |      |      |      |      | Thailand            | 2005 | 2012 |             |      |      |  |
| Guinea            | 1999  | 2005 | 2012 |      |      |      |      | Timor_Leste         | 2009 |      |             |      |      |  |
| Guinea_Bissau     | 2006  | 2014 |      |      |      |      |      | Togo                | 1998 | 2006 | 2010        | 2013 |      |  |
| Guyana            | 2006  | 2009 | 2014 |      |      |      |      | Trinidad_and_Tobago | 2006 |      |             |      |      |  |
| Haiti             | 1994# | 2000 | 2005 | 2012 |      |      |      | Tunisia             | 2011 |      |             |      |      |  |
| Honduras          | 2005  | 2011 |      |      |      |      |      | Turkey              | 1993 | 1998 | 2003        |      |      |  |
| India             | 1998  | 2005 |      |      |      |      |      | Turkemistan         | 2006 |      |             |      |      |  |
| Indonesia         | 1997  | 2002 | 2007 | 2012 |      |      |      | Uganda              | 1995 | 2000 | 2006        | 2011 |      |  |
| Iraq              | 2006* | 2011 |      |      |      |      |      | Ukraine             | 2005 | 2012 |             |      |      |  |

|            |       |      |      |      |      |  |  |            |      |      |      |      |      |      |
|------------|-------|------|------|------|------|--|--|------------|------|------|------|------|------|------|
| Jamaica    | 2005* | 2011 |      |      |      |  |  | Uruguay    | 2012 |      |      |      |      |      |
| Jordan     | 1997  | 2002 | 2007 | 2012 |      |  |  | Uzbekistan | 1996 | 2006 |      |      |      |      |
| Kazakhstan | 1995  | 1999 | 2006 | 2010 |      |  |  | Vietnam    | 1997 | 2002 | 2006 | 2010 | 2013 |      |
| Kenya      | 1993  | 1998 | 2003 | 2008 | 2014 |  |  | Yemen      | 2006 | 2013 |      |      |      |      |
| Kyrgyzstan | 1997  | 2006 | 2012 | 2014 |      |  |  | Zambia     | 1996 | 2001 | 2007 | 2013 |      |      |
| Lao        | 2006  | 2011 |      |      |      |  |  | Zimbabwe   | 1994 | 1999 | 2005 | 2009 | 2010 | 2014 |
