# Supplementary material for: Absolute income is a better predictor of coverage by skilled birth attendance than relative wealth quintiles in a multicountry analysis: comparison of 100 low- and middle-income countries
Source: Springer Nature journal article supplement (doi:10.1186/s12884-018-1734-0), 2018-04-16
Supplement: MOESM2 [file 15703274]

**Web appendix Table and Figures**

|                            | <b>Institutional delivery coverage (coefficients expressed as percent point)</b> |                        |                            |                                |                        |                            |                            |
|----------------------------|----------------------------------------------------------------------------------|------------------------|----------------------------|--------------------------------|------------------------|----------------------------|----------------------------|
| <b>Analysis level</b>      | <b>Cross-country analysis</b>                                                    |                        |                            | <b>Within country analysis</b> |                        |                            |                            |
|                            | Model 1                                                                          | Model2                 | Model 3                    | Model 4                        | Model 5                | Model 6                    | Model 7                    |
| Asset quintile 1           | 0 (reference)<br>p <0.001                                                        |                        |                            | 0 (reference)<br>p <0.001      |                        |                            | 0 (reference)<br>p=0.320   |
| Asset quintile 2           | 10.03 (0.99)                                                                     |                        |                            | 10.03 (1.11)                   |                        |                            | 0.16<br>(3.85)             |
| Asset quintile 3           | 18.52 (1.80)                                                                     |                        |                            | 18.52 (2.01)                   |                        |                            | 2.14<br>(6.37)             |
| Asset quintile 4           | 28.34 (2.22)                                                                     |                        |                            | 28.34 (2.48)                   |                        |                            | 5.40<br>(9.03)             |
| Asset quintile 5           | 40.54 (2.53)                                                                     |                        |                            | 40.54 (2.82)                   |                        |                            | 5.74<br>(13.80)            |
| Mean wealth scores         |                                                                                  | 7.14 (1.83)<br>P<0.001 |                            |                                | 6.86 (1.94)<br>P<0.001 |                            |                            |
| Log income*                |                                                                                  |                        | 19.46<br>(1.37)<br>p<0,001 |                                |                        | 18.68<br>(1.26)<br>p<0.001 | 15.74<br>(6.08)<br>p=0.011 |
| Survey specific intercepts | NO                                                                               | NO                     | NO                         | YES                            | YES                    | YES                        | YES                        |
| R-squared                  | 0.200                                                                            | 0.120                  | 0.475                      | 0.896                          | 0.804                  | 0,901                      | 0,902                      |

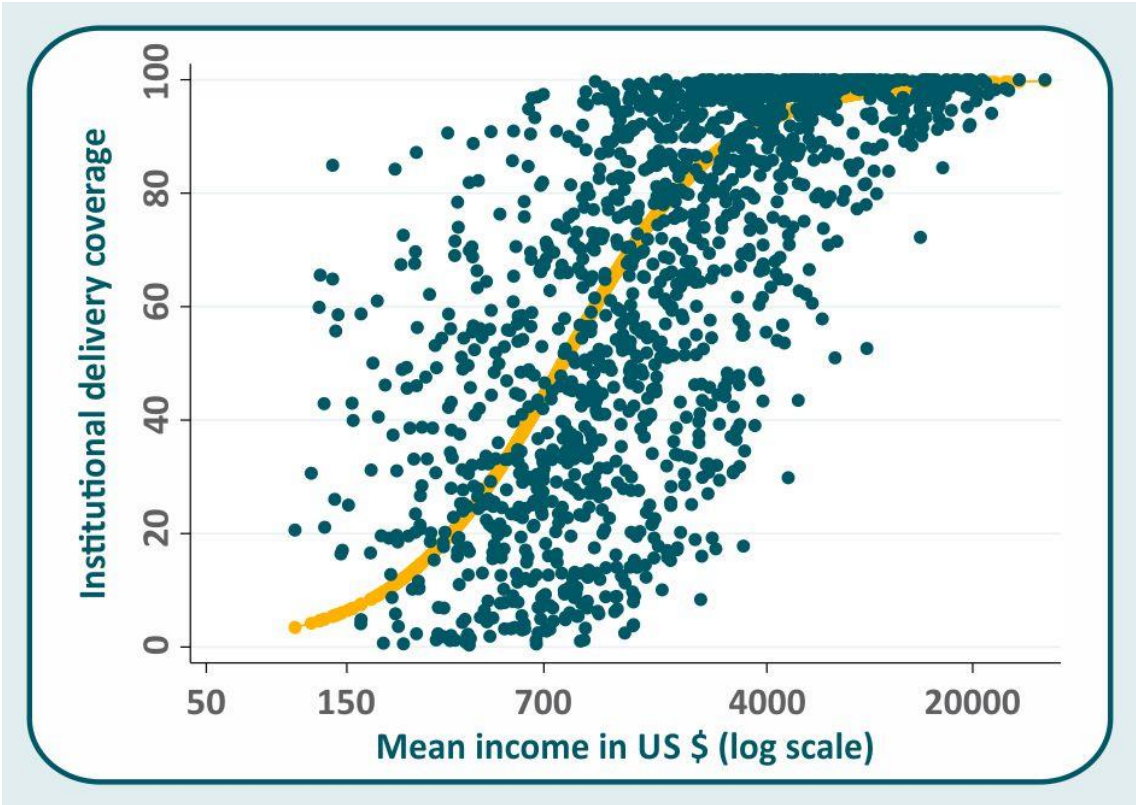

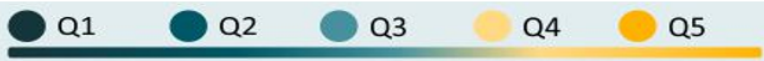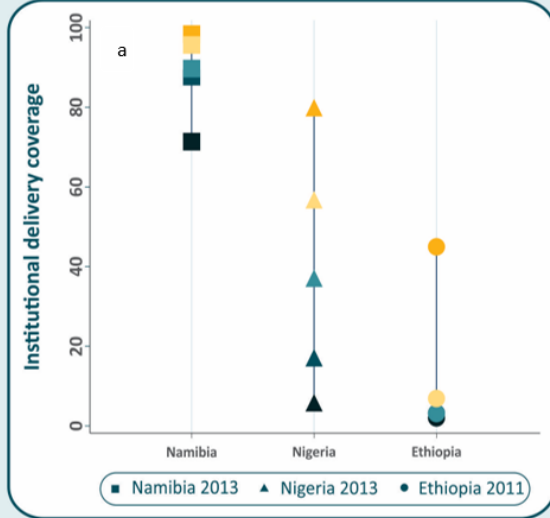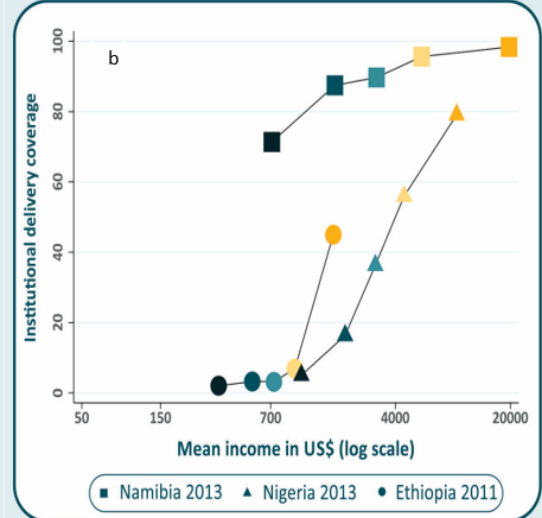

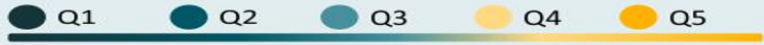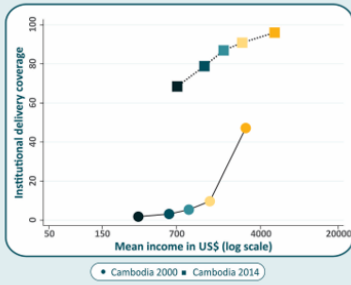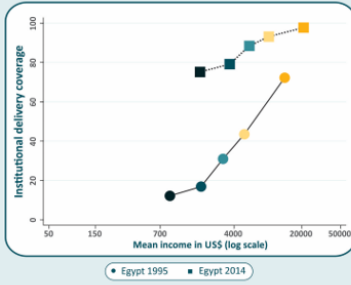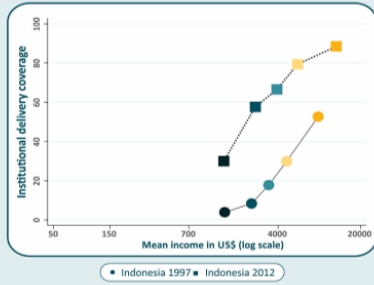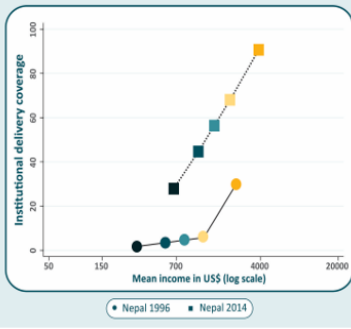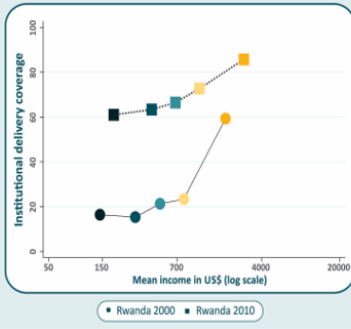

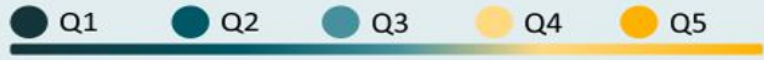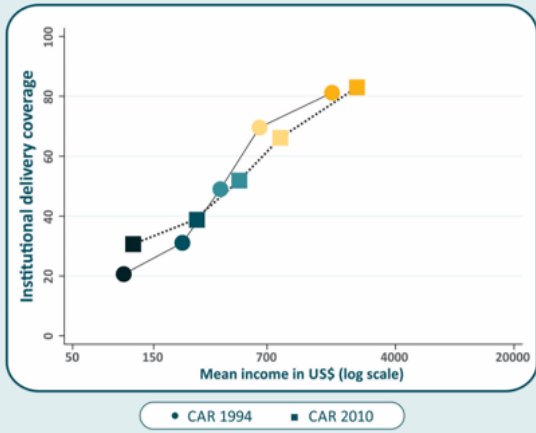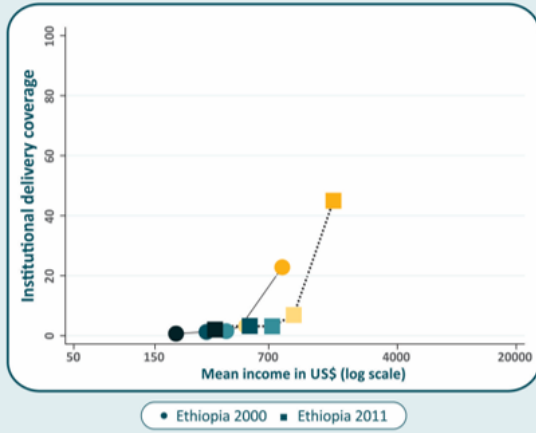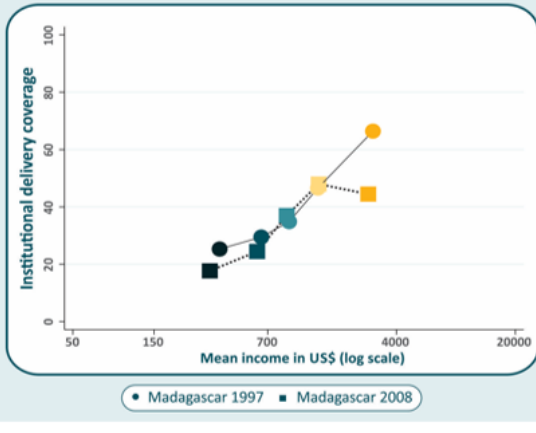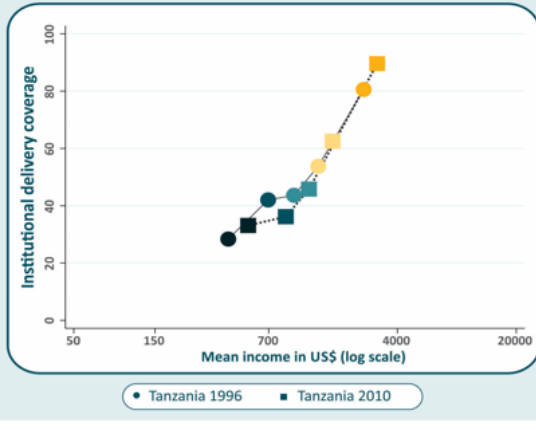

Q1
  Q2
  Q3
  Q4
  Q5

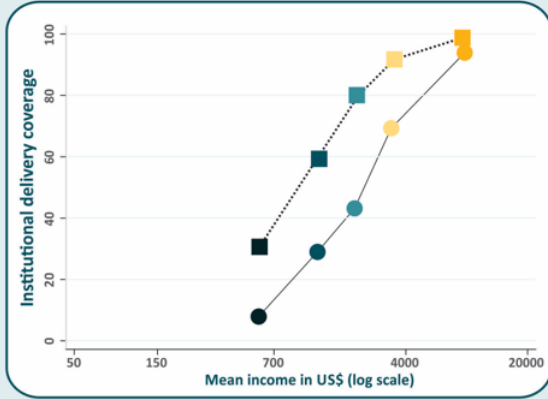

Bolivia 1994
  Bolivia 2008

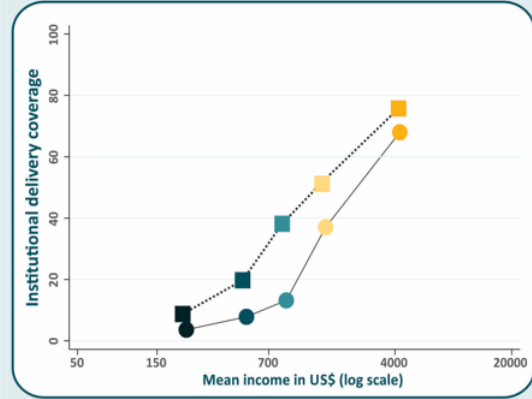

Haiti 2000
  Haiti 2012
